# Supplementary material for: Neo-Adjuvant Treatment in Primary Resectable Pancreatic Cancer: A Systematic Review and PRISMA-Compliant Updated Metanalysis of Oncological Outcomes
Source: MDPI journal article supplement (doi:10.3390/cancers15184627), 2023-09-19
Supplement: s1 [file s1]

**Table S1. Studies Characteristics.**

| Author                    | Neoadjuvant Regimen                                                       | Adjuvant Chemotherapy                                                                                          | Gender<br>(Male/Female)        | Age *                                                                                                                      |
|---------------------------|---------------------------------------------------------------------------|----------------------------------------------------------------------------------------------------------------|--------------------------------|----------------------------------------------------------------------------------------------------------------------------|
| Barbier et al. (2011)     | 5 FU + Cisplatin + RT<br>Upfront Surgery                                  | None<br>5 FU or Gem                                                                                            | NR                             | NAT: 65 (39-81)<br>US: 64 (37-79)                                                                                          |
| Birrer et al. (2021)      | Gem + Oxaliplatin<br>Upfront Surgery                                      | Gem<br>Gem                                                                                                     | NR                             | NR                                                                                                                         |
| Casadei et al. (2015)     | Gem 6 weeks + (Gem+RT) 6<br>weeks<br>Upfront Surgery                      | Gem<br>Gem                                                                                                     | NAT: 8/10<br>US: 14/6          | NAT: 71.5 (51-<br>78)<br>US: 67.5 (48-79)                                                                                  |
| Fujii et al. (2017)       | 5 FU + Oteracil and Gimeracil +<br>S-1 RT<br>Upfront Surgery              | Gem or Capecitabine<br>Gem + Capecitabine                                                                      | NAT: 21/19<br>US: 146/87       | NAT: 65 (36-79)<br>US: 67 (35-88)                                                                                          |
| Golcher et al. (2015)     | Gem + Cispatin + RT<br>Upfront Surgery                                    | Gem<br>Gem                                                                                                     | NAT: 17/16<br>US: 18/15        | NAT: 62.5 (33-<br>76)<br>US: 65.1 (46-73)                                                                                  |
| Mokdad et al. (2017)      | Chemotherapy (NR)<br><br>Upfront Surgery                                  | -<br><br>-                                                                                                     | NAT: 1044/961<br>US: 3150/2865 | NAT: 18-55: 340,<br>55-64: 650; 65-74:<br>729; ≥ 75: 286;<br>US: 18-55: 985;<br>55-64: 1972; 65-<br>74: 2222; ≥ 75:<br>836 |
| Papalezova et al. (2012)  | 5-FU + RT<br>Upfront Surgery                                              | Gem<br>5FU                                                                                                     | NAT: 75/69<br>US: 49/43        | NAT: 64 ± 12<br>US: 65 ± 12                                                                                                |
| Reni et al. (2018)        | Capecitabine + Gem + Cisplatin<br>+ Epirubicin<br>Upfront Surgery         | Capecitabine + Gem +<br>Cisplatin + Epirubicin<br>Capecitabine + Gem +<br>Cisplatin + Epirubicin               | NAT: 25/7<br>US: 13/17         | NAT: 64 (39-75)<br>US: 68 (49-75)                                                                                          |
| Roland et al. (2015)      | Gem of 5 FU + RT<br>Upfront Surgery                                       | Gem (10%)<br>Gem ± RT                                                                                          | NAT: 126/96<br>US: 43/42       | NAT: 64 (35-86)<br>US: 64 (40-85)                                                                                          |
| Seufferlein et al. (2023) | Gem + Abraxane<br>Upfront Surgery                                         | Gem                                                                                                            | NAT: 34/25<br>US: 37/22        | NAT: 65 (48-82);<br>US: 68 (41-88)                                                                                         |
| Sho et al. (2015)         | Gem + RT or Capecitabine<br>Upfront Surgery                               | WHF + Gem or Gem<br>alone<br>WHF + Gem                                                                         | NAT: 24/20<br>US: 32/24        | NAT: 66.4 ± 8.5<br>US: 69.7 ± 9.1                                                                                          |
| Tzeng et al. (2014)       | Gem + Cis + RT<br>Upfront Surgery                                         | -<br>Gem                                                                                                       | NAT: 61/54<br>US: 30/22        | NAT: 65.5 (38-<br>79)<br>US: 61.9 (25-79)                                                                                  |
| Verstaijne et al. (2022)  | Gem + RT<br>Upfront Surgery                                               | Gem<br>Gem                                                                                                     | NAT: 64/55<br>US: 74/53        | NAT: 66 (59.71)<br>US: 67 (60-73)                                                                                          |
| Vidri et al. (2021)       | Chemotherapy (NR)<br>Upfront surgery                                      | NR                                                                                                             | NAT: 600/518;<br>US: 1304/1502 | NAT: 63.4 (10.0);<br>US: 69.0 (10.9)                                                                                       |
| Yoon et al. (2022)        | Gem + 5-FU + Leucovorin,<br>Irinotecan + Oxaplatin<br><br>Upfront Surgery | Gem + 5-FU +<br>Leucovorin, Irinotecan +<br>Oxaplatin<br>Gem + 5-FU +<br>Leucovorin, Irinotecan +<br>Oxaplatin | NAT: 21/14;<br>US: 73/94       | NAT: 67.0 (58-<br>73);<br>US: 60 (56-70)                                                                                   |

\* Age is reported as median (range) or mean ± standard deviation – Gem: gemcitabine; 5-FU: 5-fluorouracil; NAT: Neoadjuvant Therapy; US: US – NR: Not reported

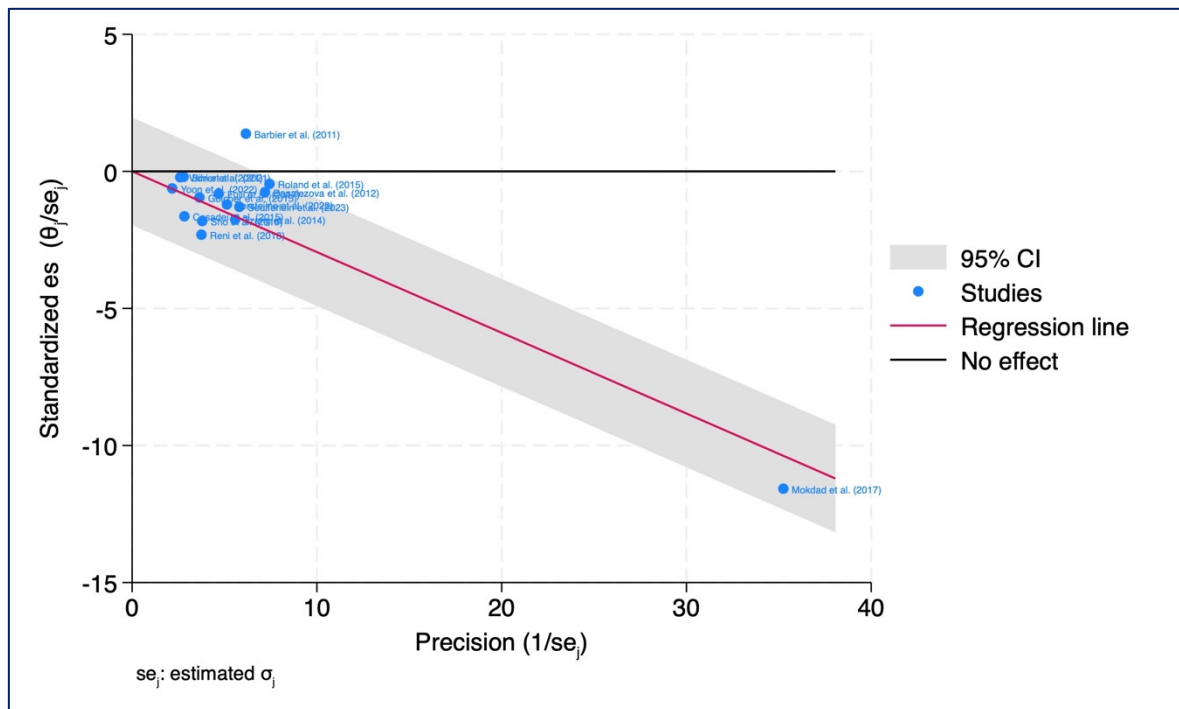

**Figure S1.** Overall Survival: Galbraith Plot.

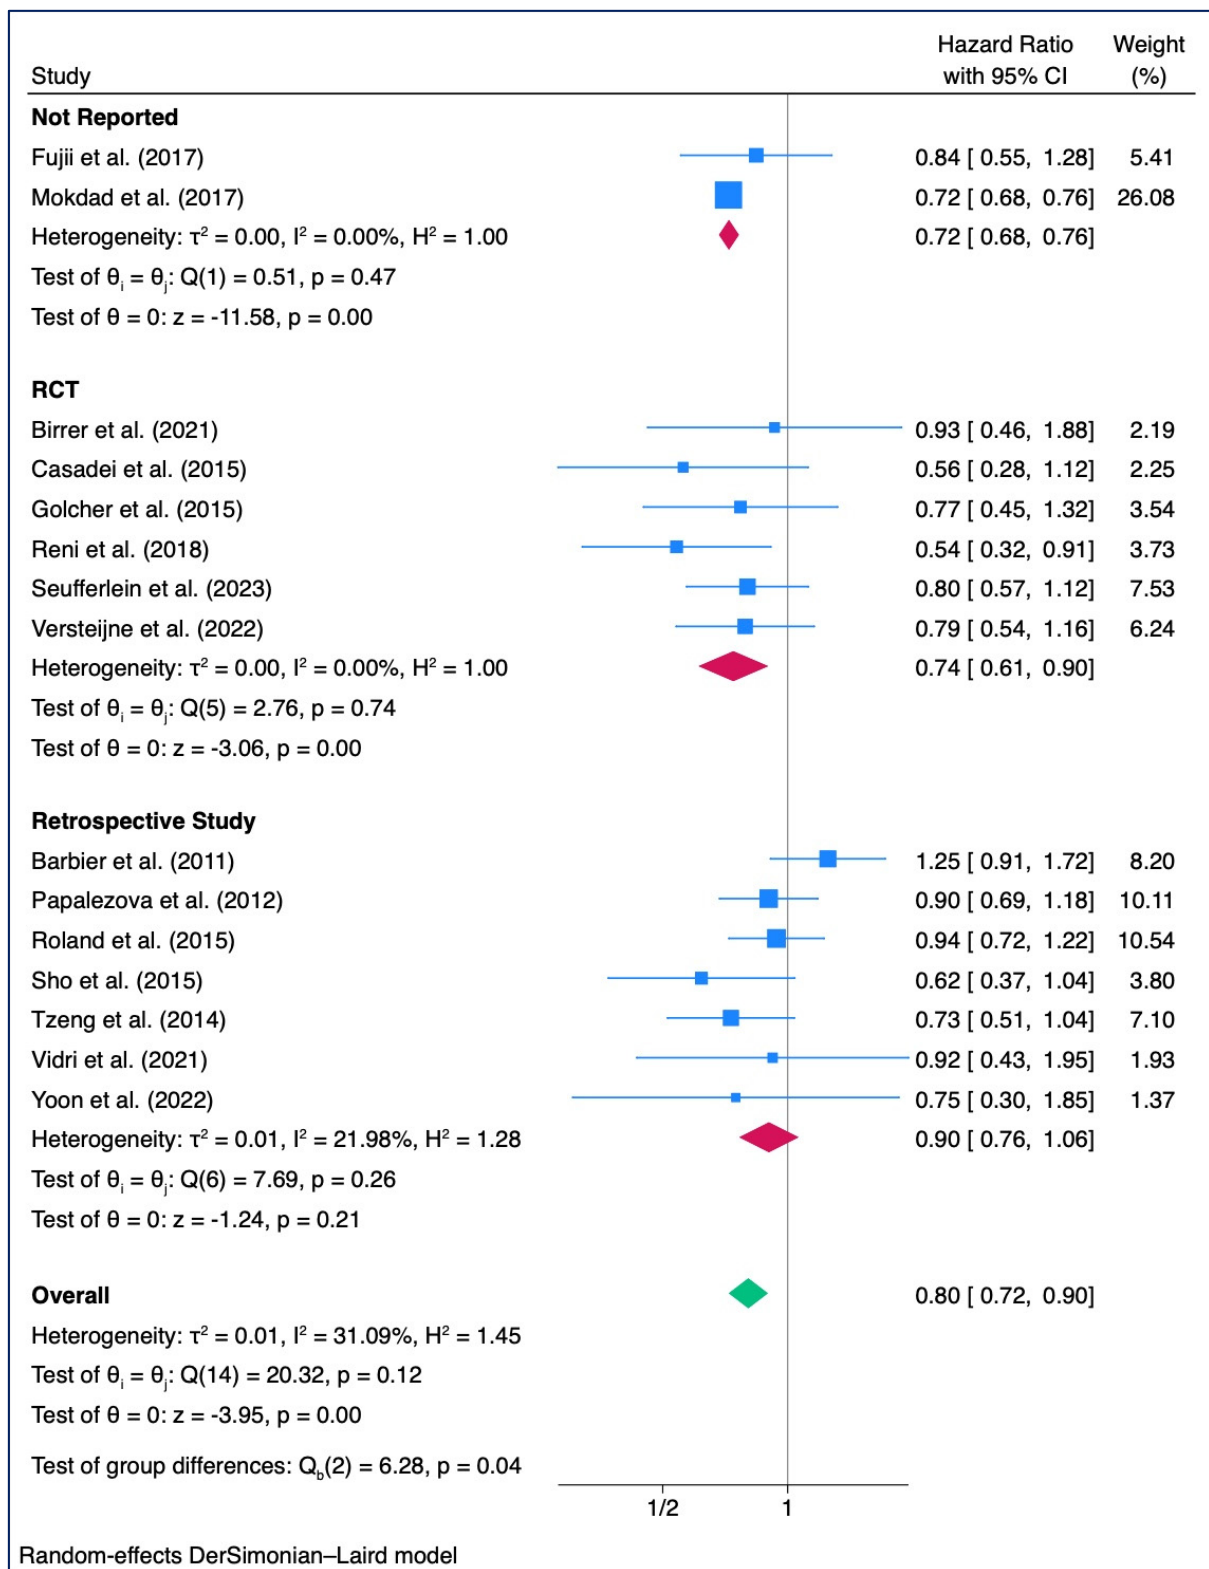

**Figure S2.** Overall Survival: Subgroup analysis related to study design—(RCT = 6, retrospective studies = 7, Study design Not Reported = 2).

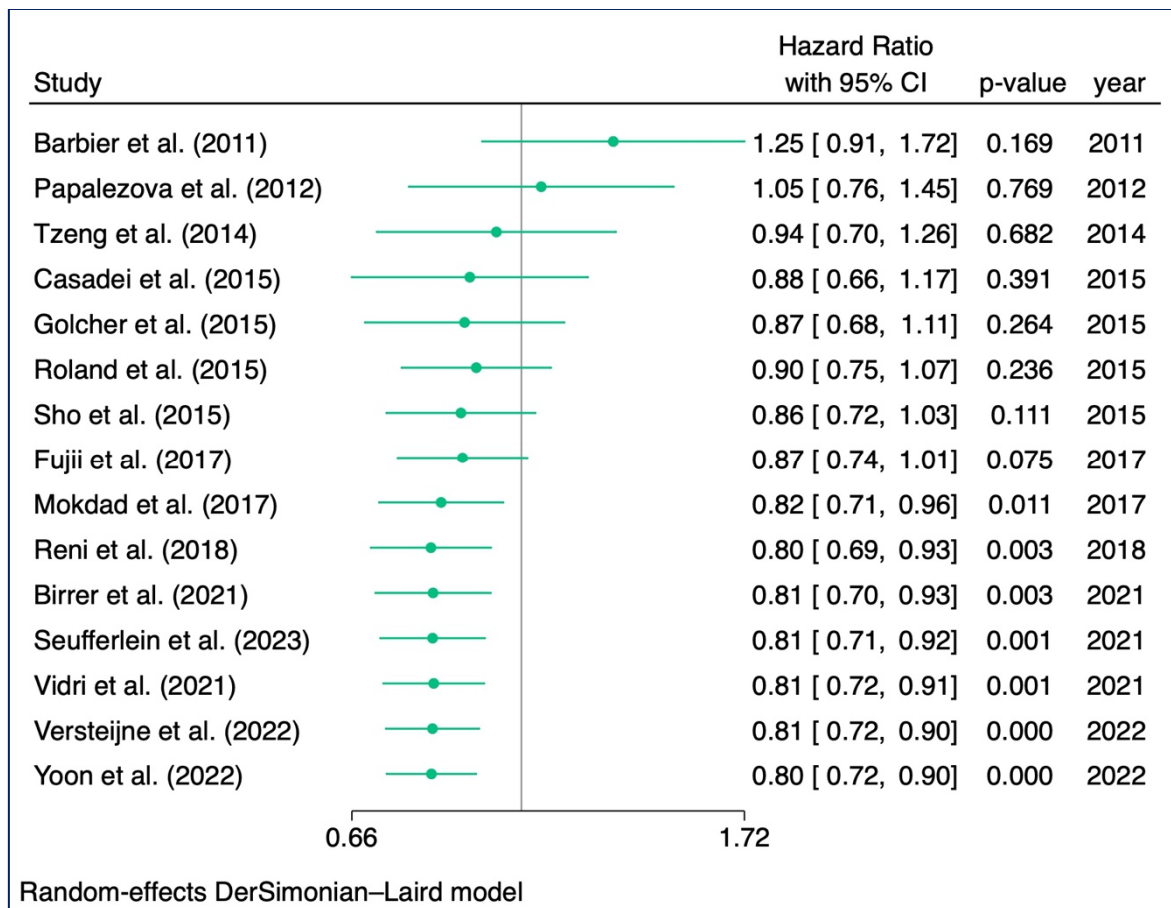

**Figure S3.** Overall Survival: Cumulative analysis per year.

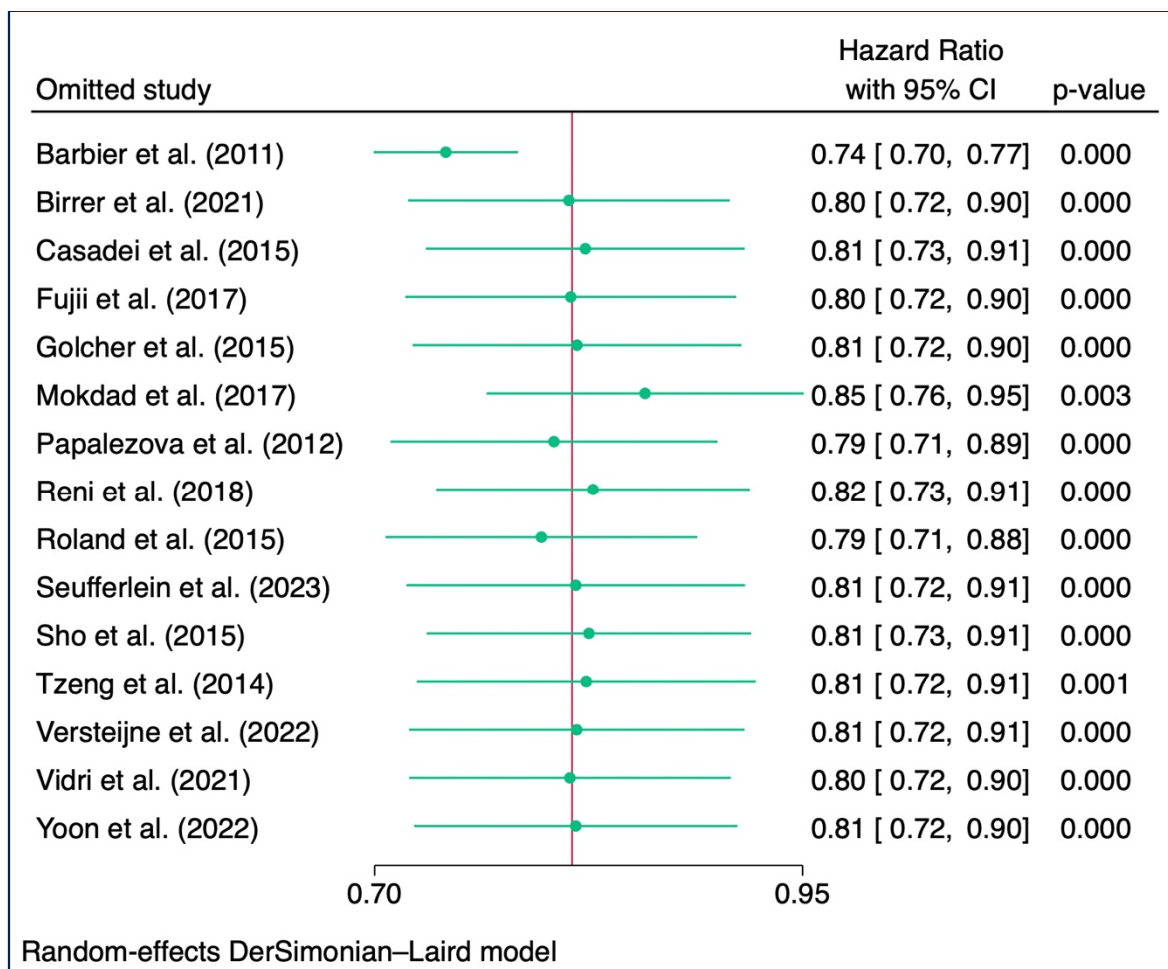

**Figure S4.** Overall Survival: Leave-one-out analysis.

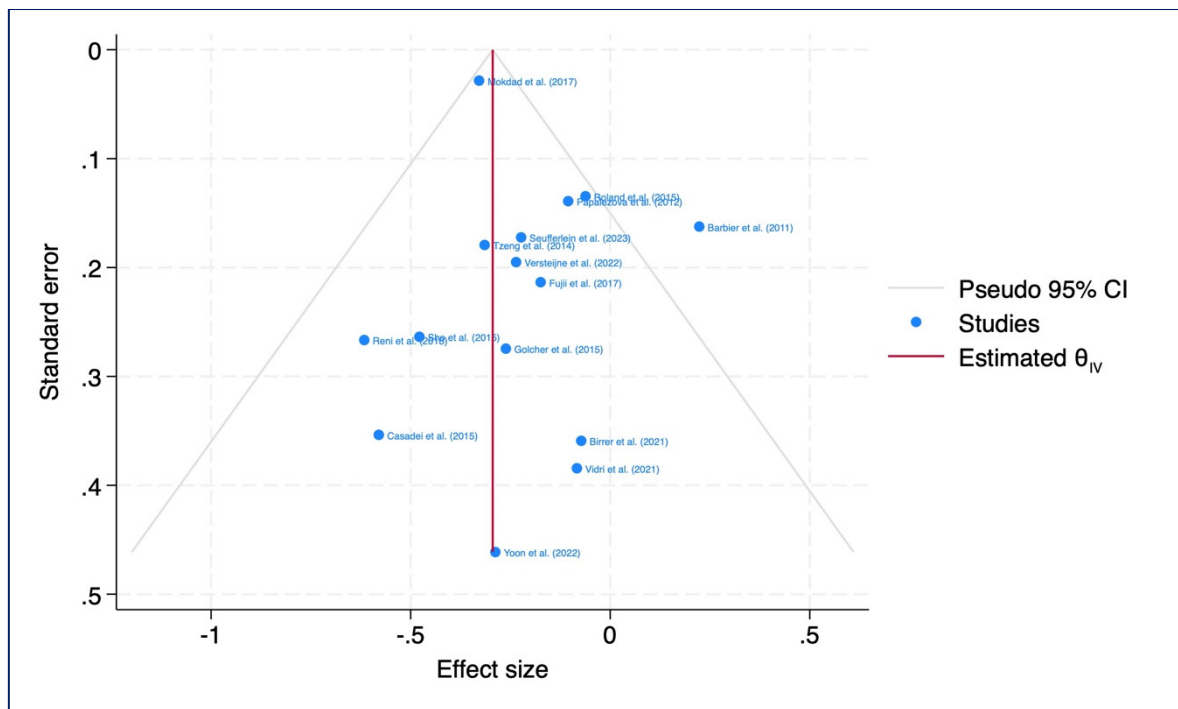

**Figure S5.** Overall Survival: Funnel plot for publication bias.

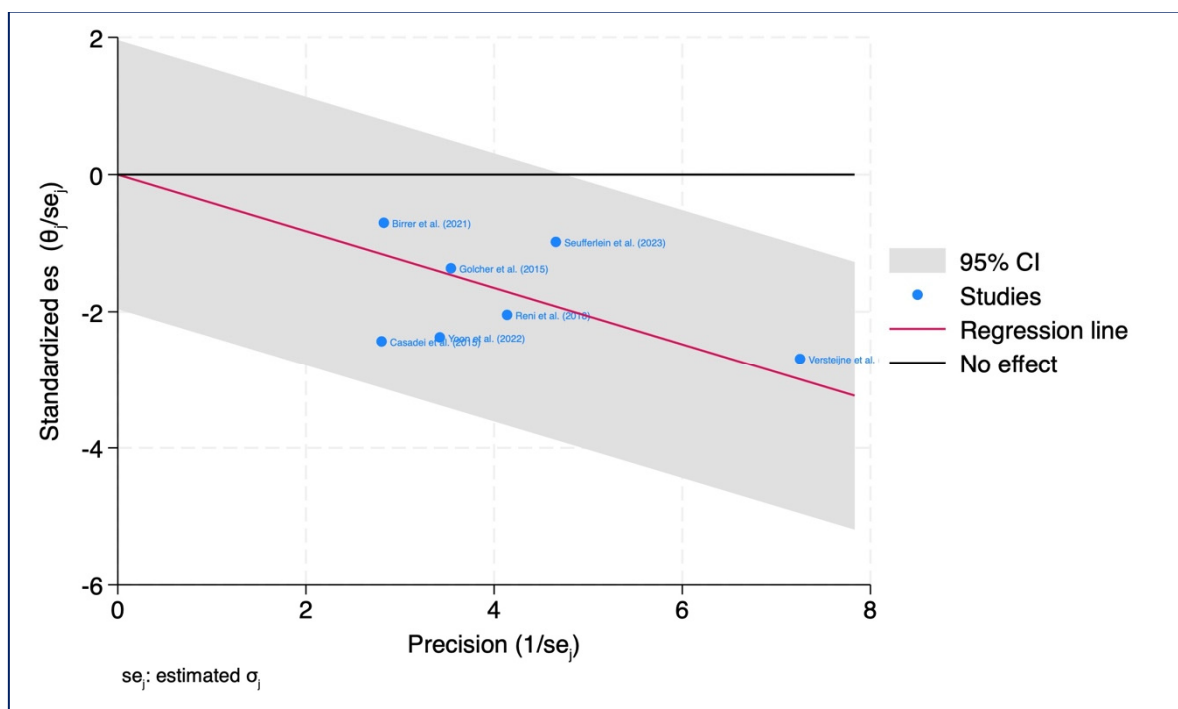

**Figure S6.** Disease Free-Survival: Galbraith Plot.

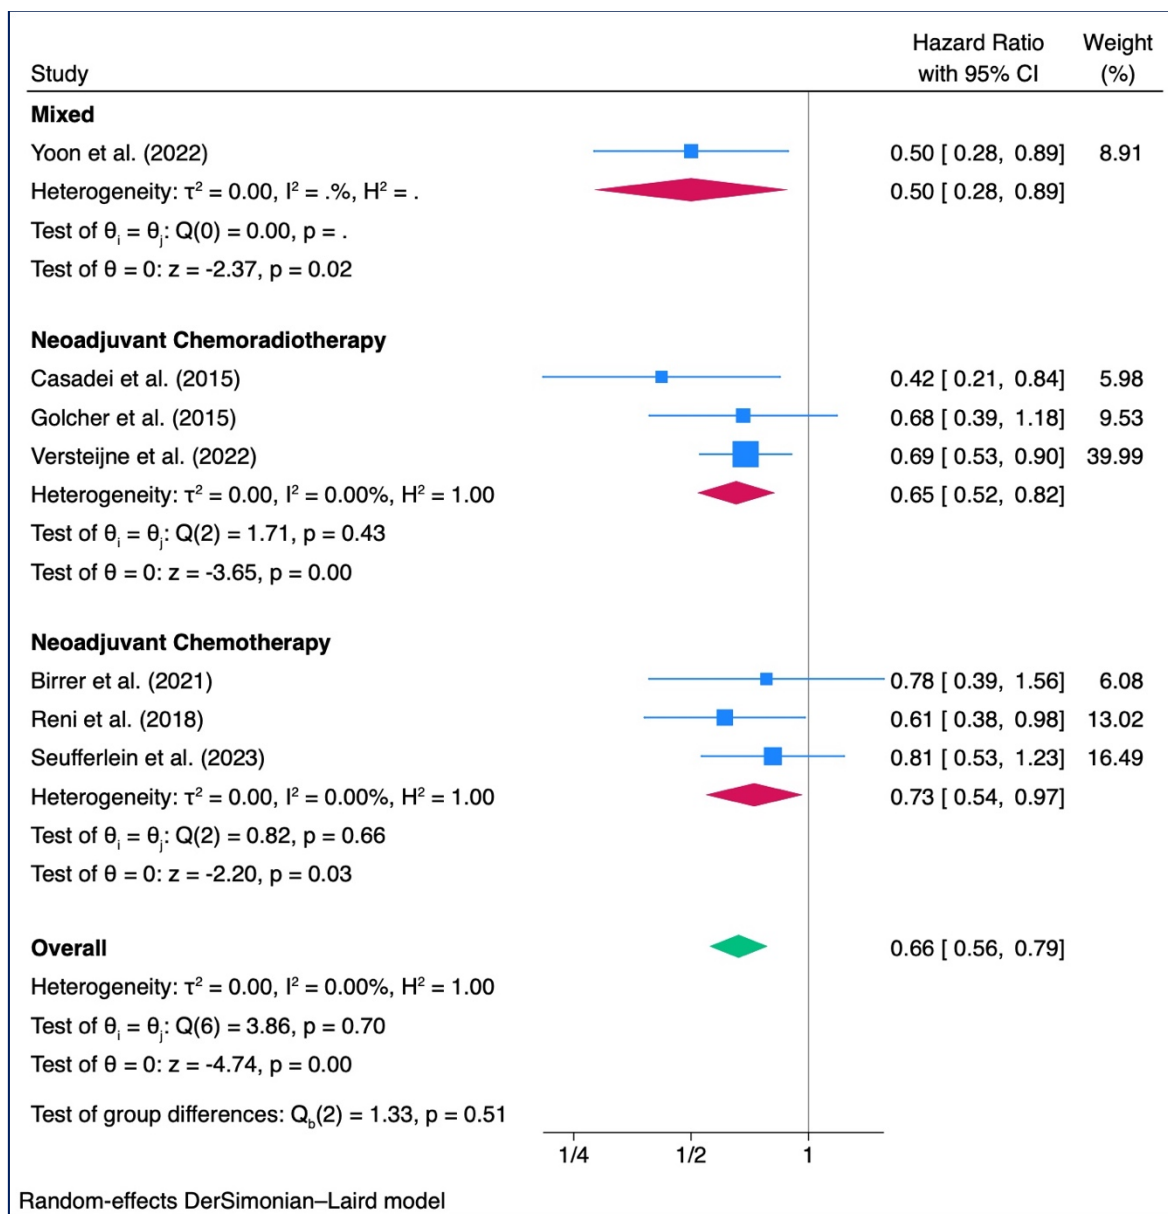

**Figure S7.** Disease Free Survival (n = 7): Forest plot—Subgroup analysis related to use of neoadjuvant chemotherapy or neoadjuvant chemoradiotherapy.

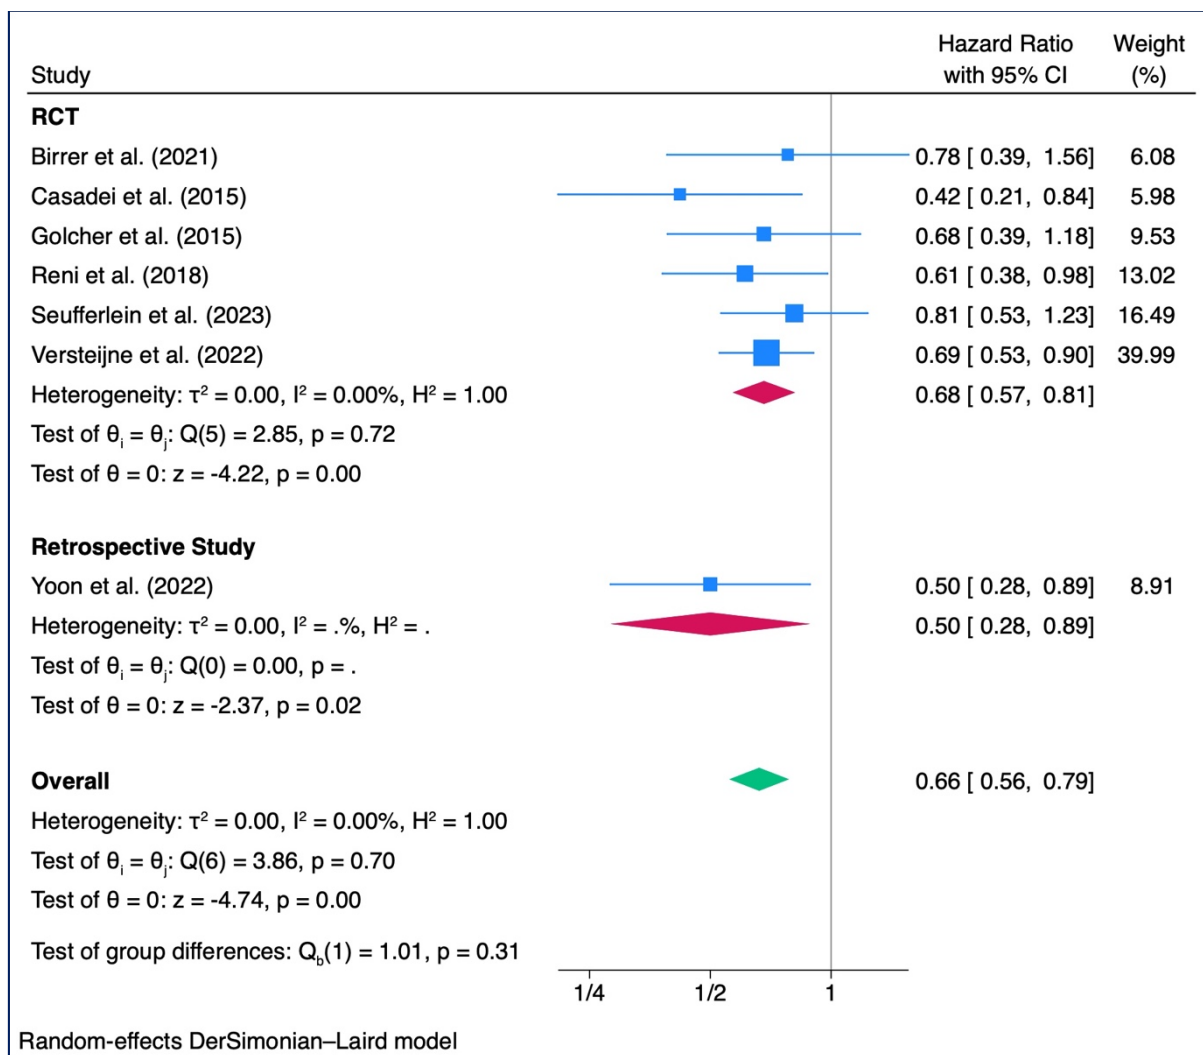

**Figure S8.** Disease Free Survival—Subgroup analysis related to study design (RCT = 6, retrospective studies = 1).



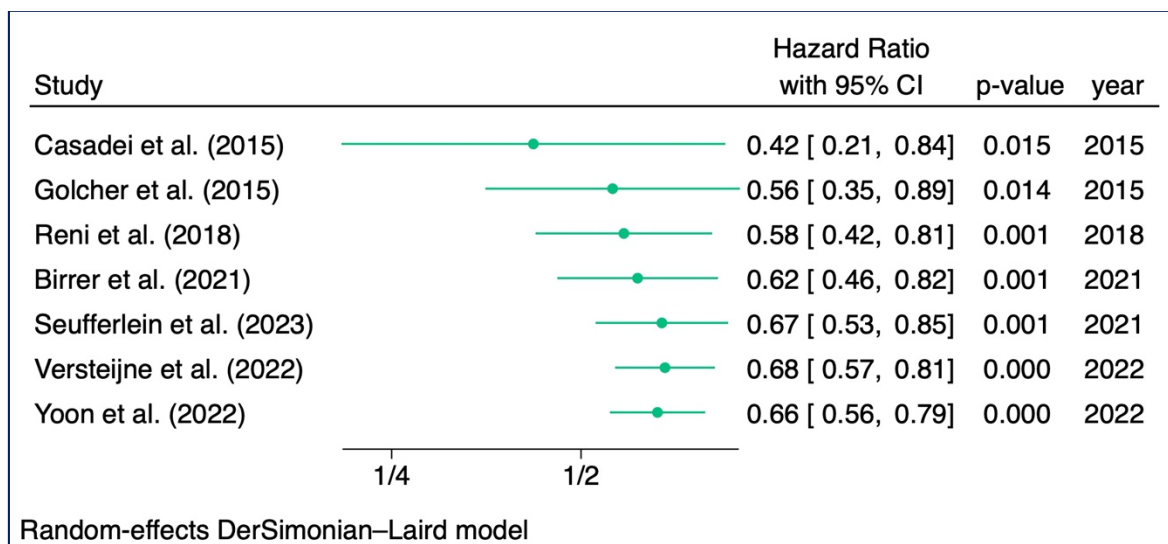

**Figure S9.** Disease Free Survival: Cumulative Meta-Analysis.

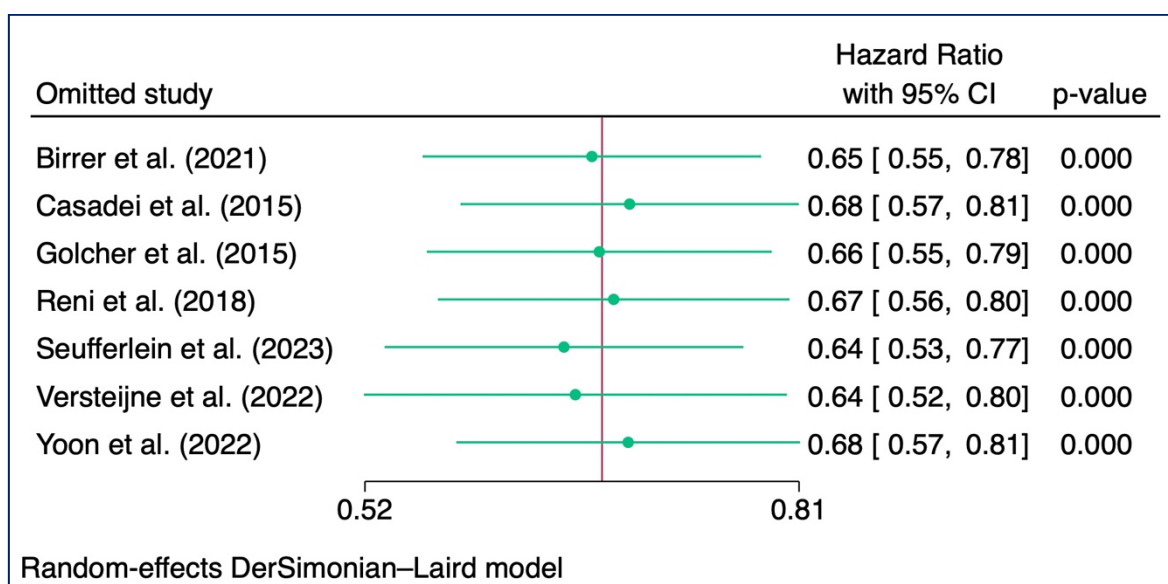

**Figure S10.** Disease Free Survival: Leave-one-out analysis.

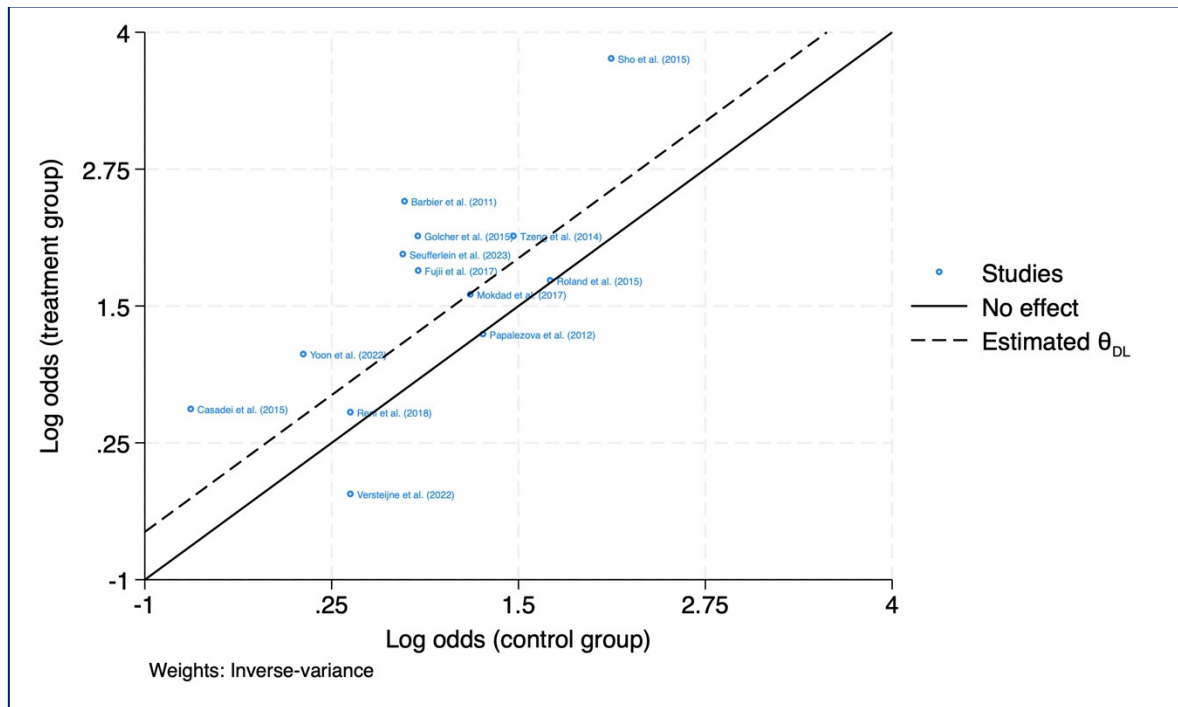

**Figure S11.** R0 Rate: L'Abbè Plot for R0 Rate Studies.

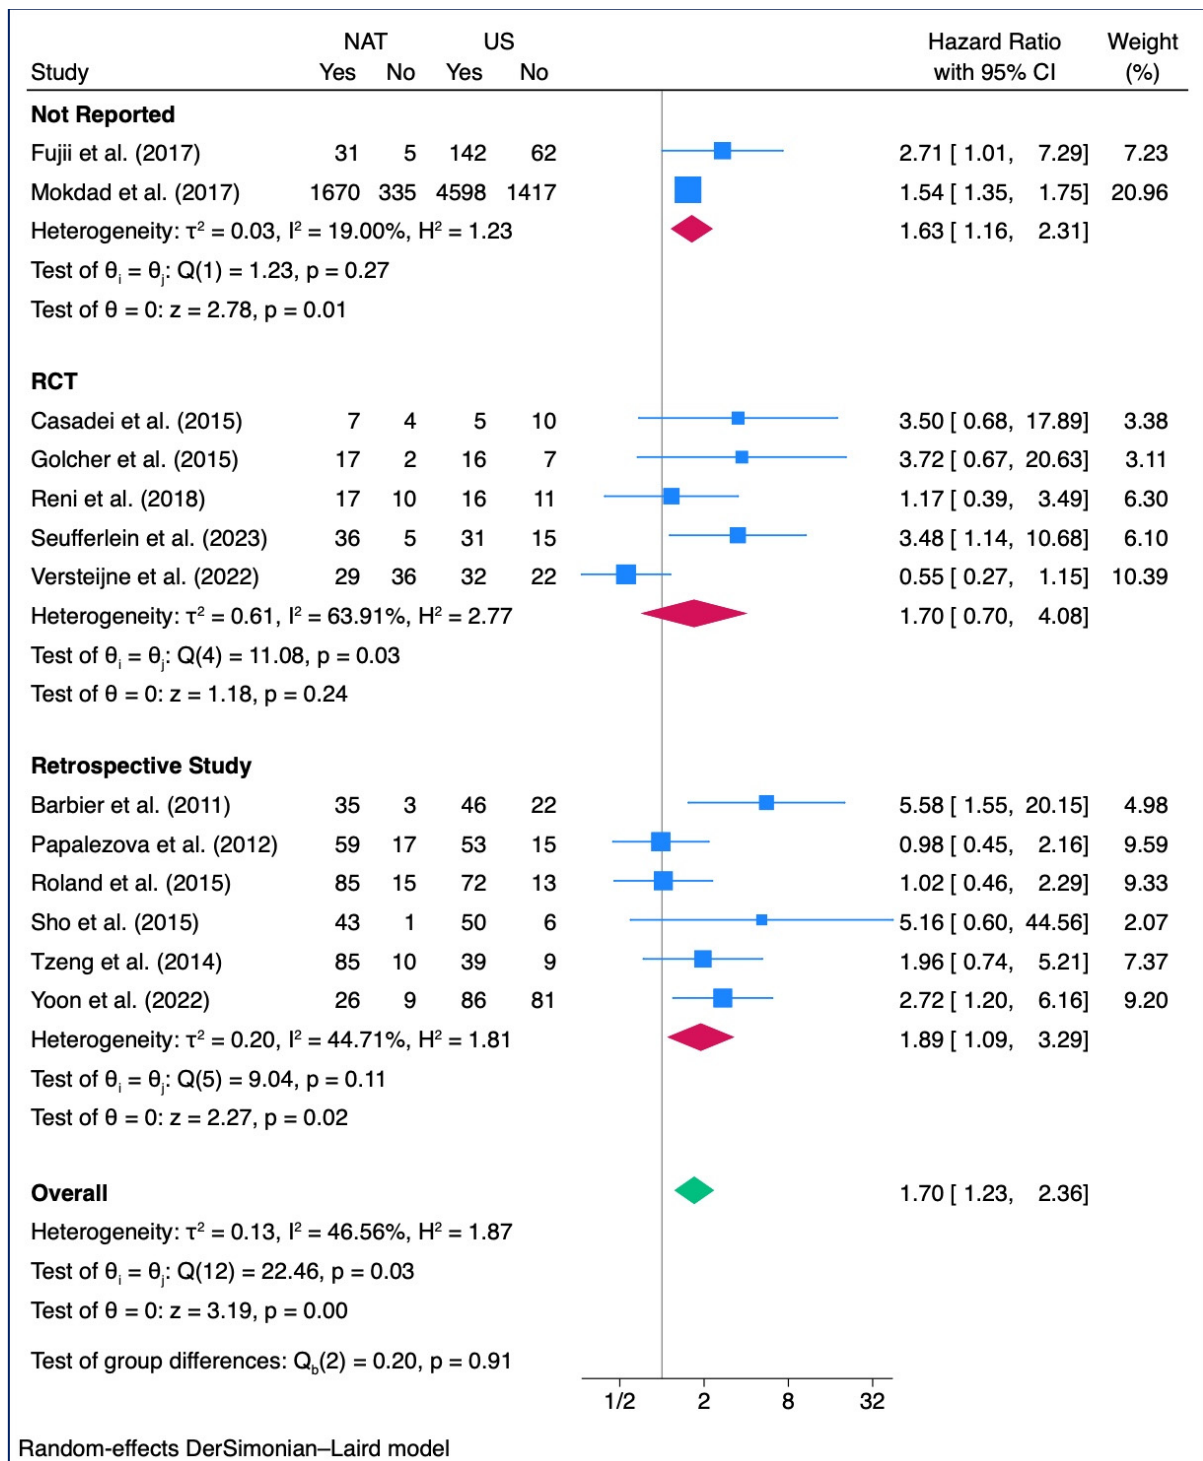

**Figure S12.** R0 Rate—Subgroup analysis related to study design (RCT = 5, retrospective studies = 6, Study design Not Reported = 2).

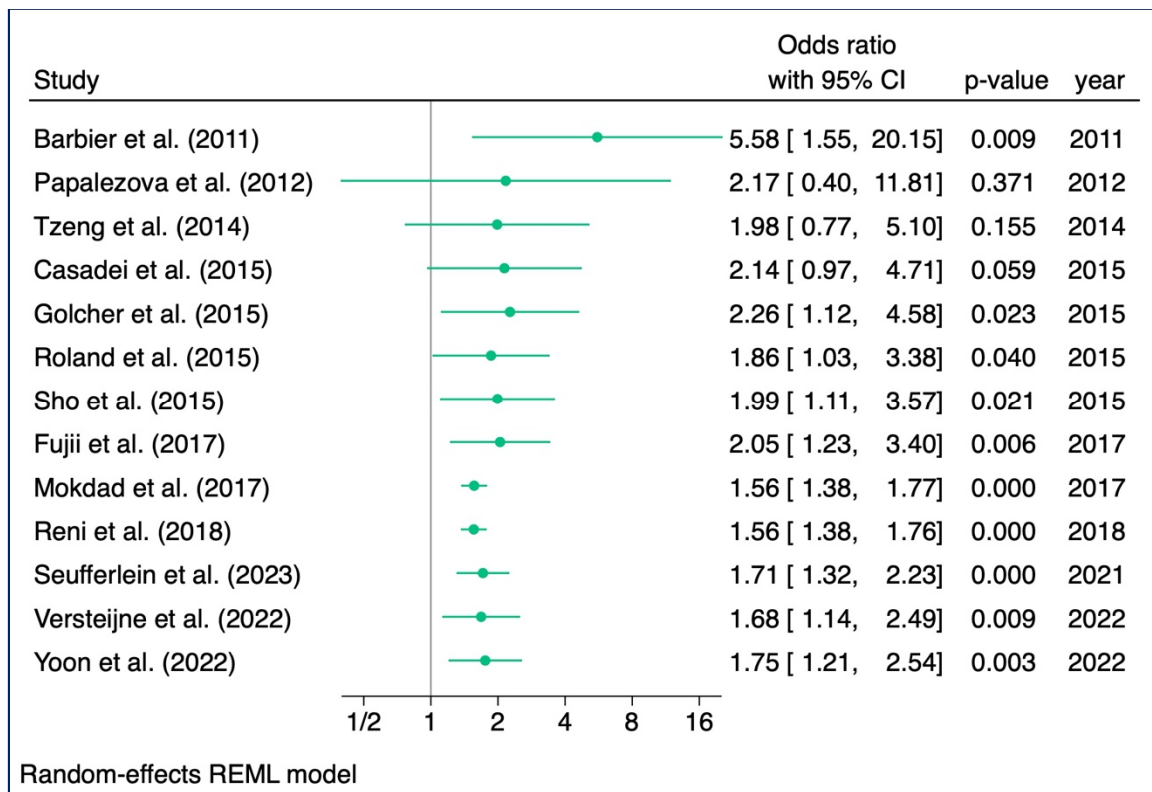

**Figure S13.** R0 Rate (n = 13): Cumulative Meta-Analysis.

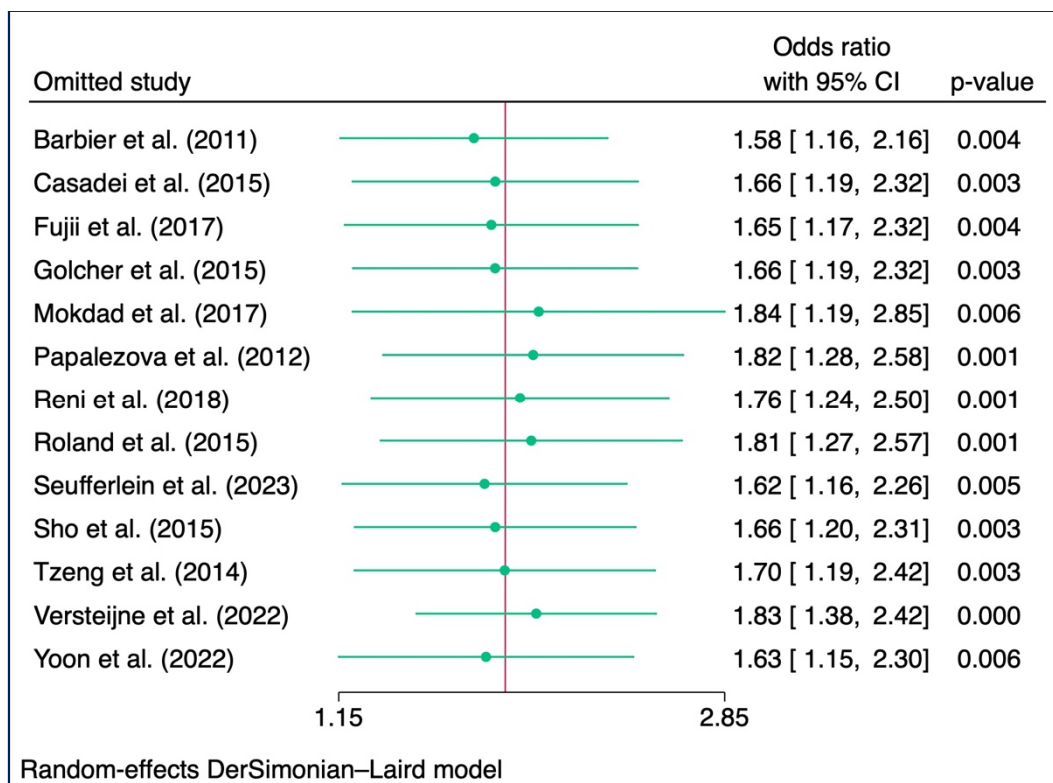

**Figure S14.** R0 Rate (n = 13): Leave-one-out Analysis.

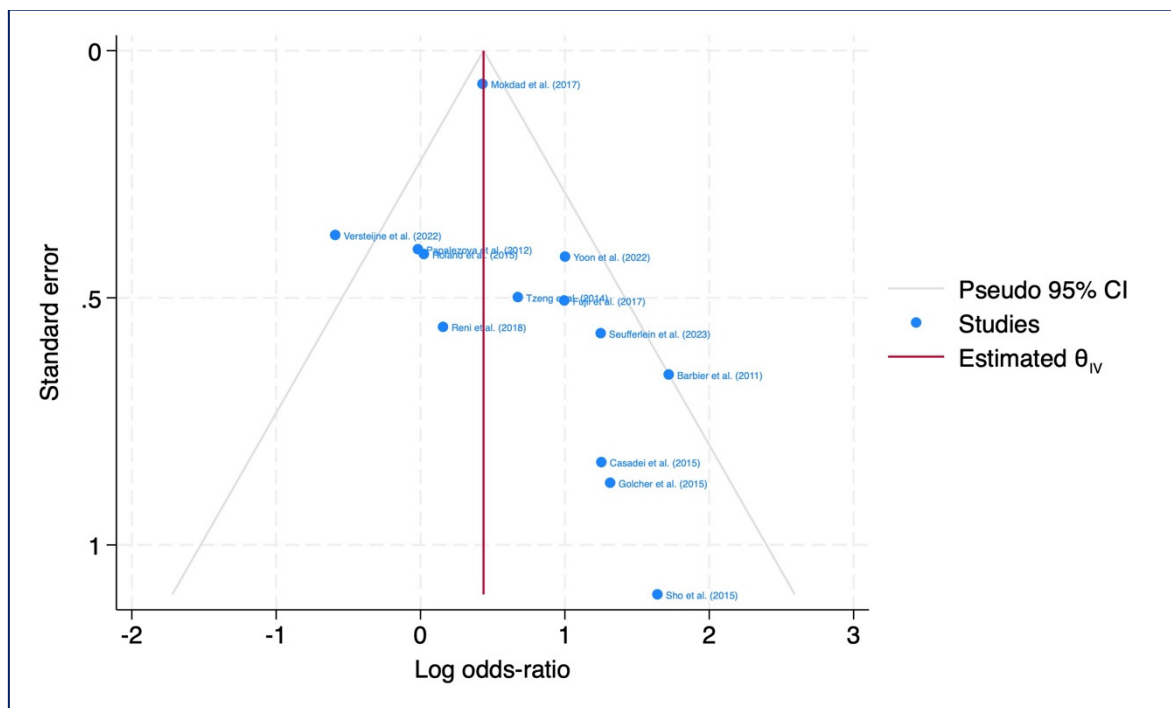

**Figure S15.** R0 Rate (n = 13): Funnel Plot—Publication Bias.

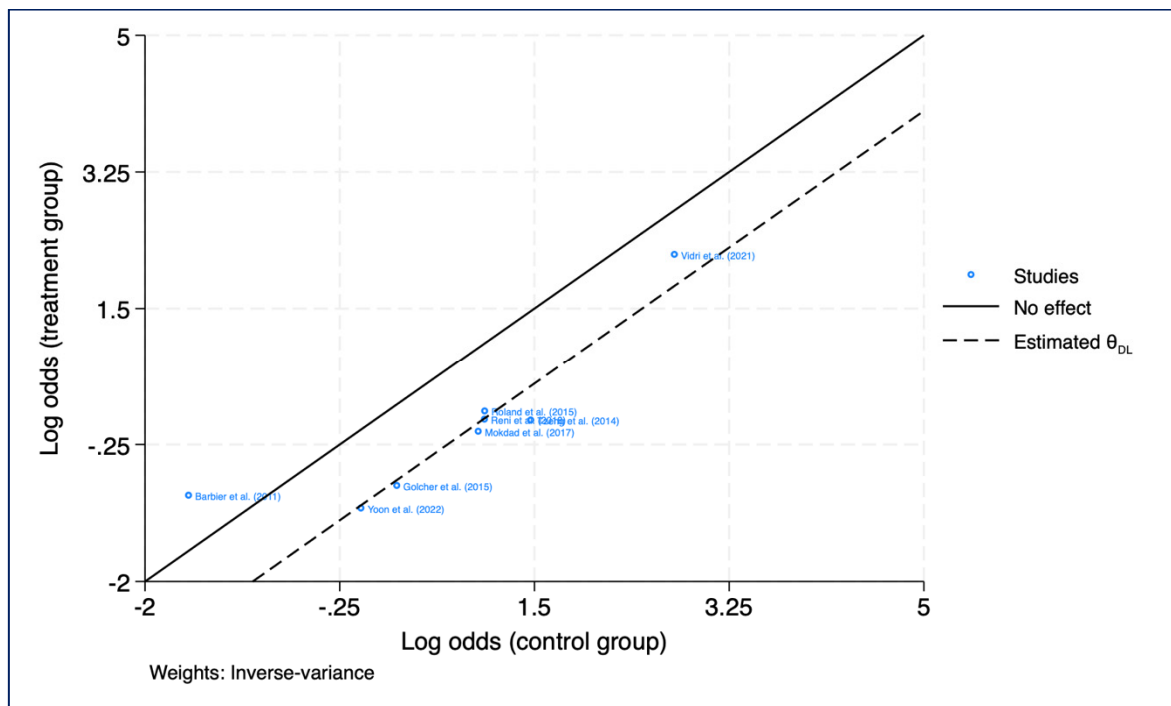

**Figure S16.** N+ Rate (n = 8): L'Abbé Plot—N+ Rate. Note: for Versteijne et al. 2022 data were extracted from the Versteijne et al. 2020.

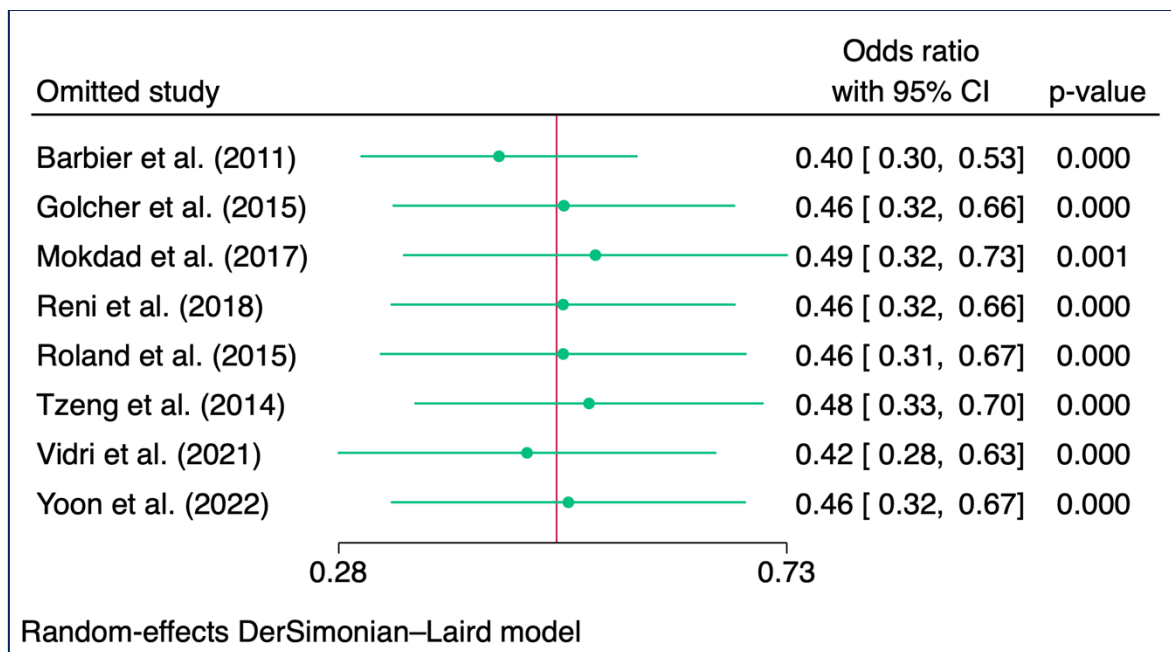

**Figure S17.** N+ Rate (n = 8): Sensitive Analysis.

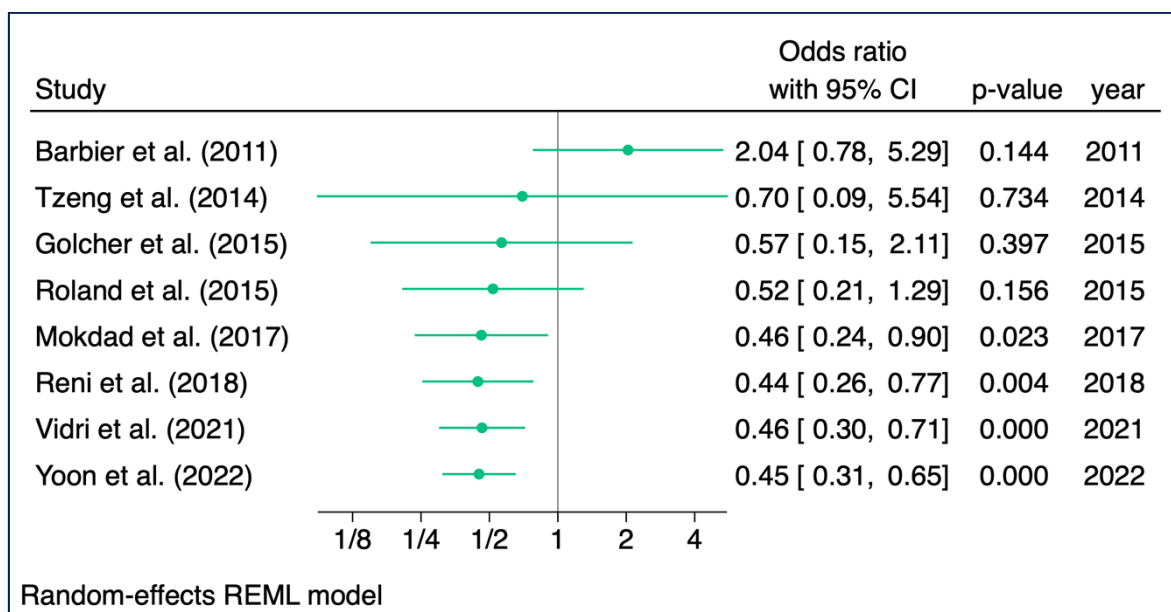

**Figure S18.** N+ Rate (n = 8): Cumulative meta-analysis.

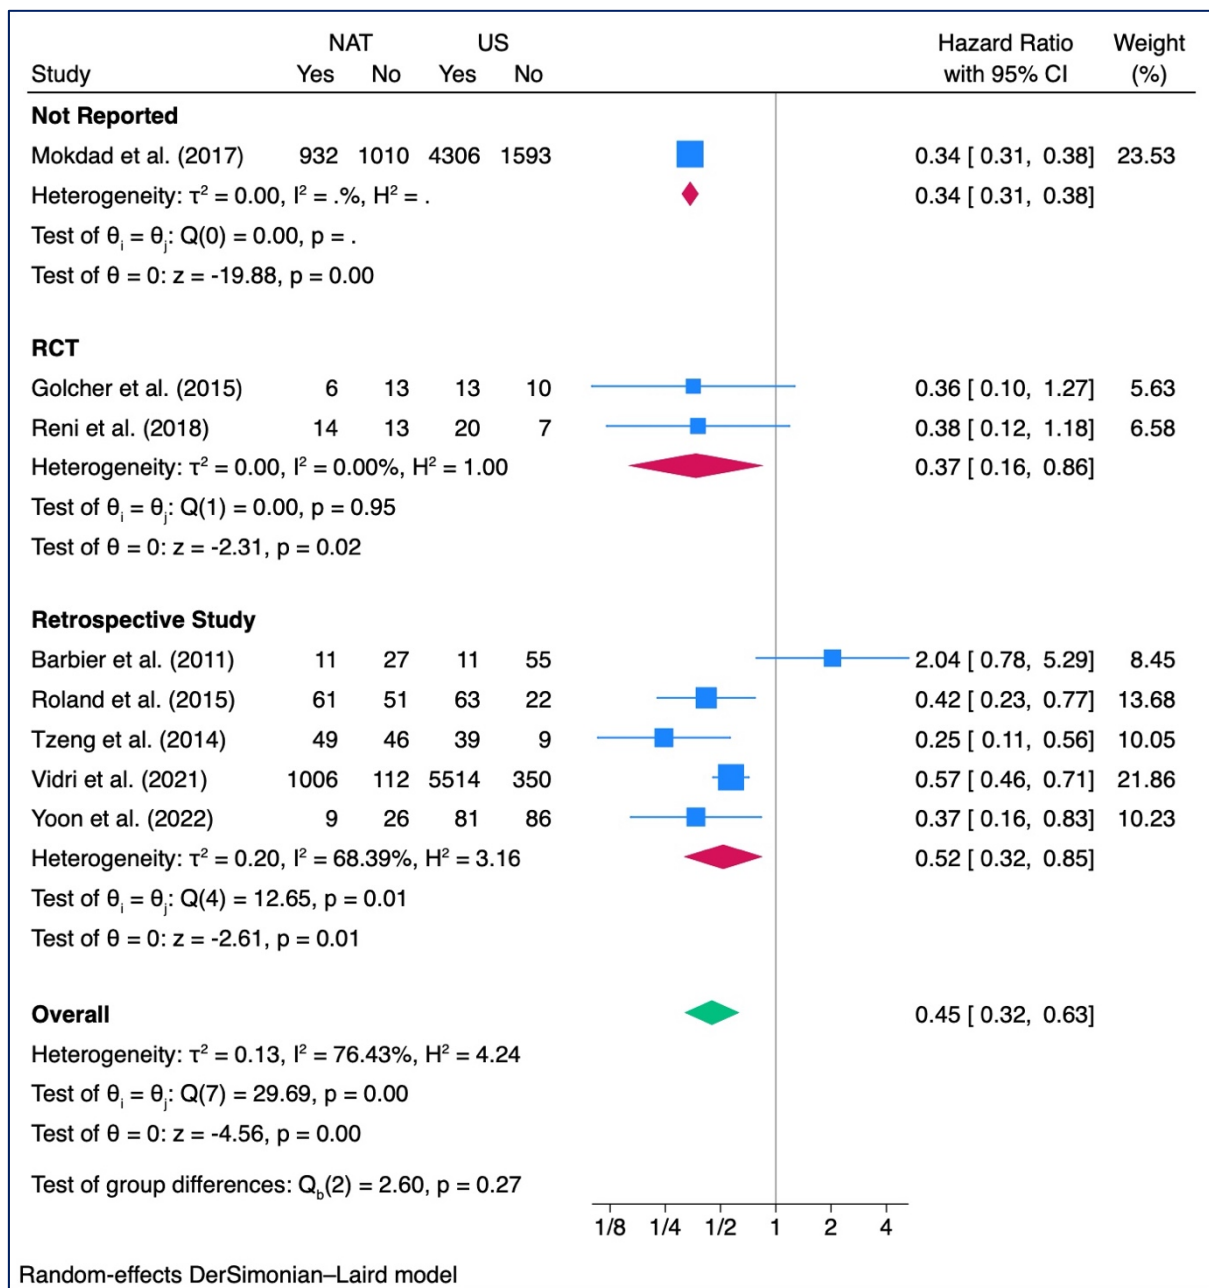

**Figure S19.** N+ Rate—Subgroup analysis related to study design (RCT = 2, retrospective studies = 5, Study design Not Reported = 1).
